# Supplementary material
Source: PubMed Central journal article supplement (PMC1913769)
Supplement: plntphys_pp.106.092130_2.pdf [file plntphys_pp.106.092130_2.pdf]

Supplement Figure1.

Histochemical GUS staining of transgenic *DR5::uidA* Arabidopsis seedlings showing different stages of lateral root development ranging from primordia initiation (stage I) to post-emergence (stage IV). Scale bar = 100  $\mu$ M.

---

---
