# Supplementary material
Source: PubMed Central journal article supplement (PMC1913769)

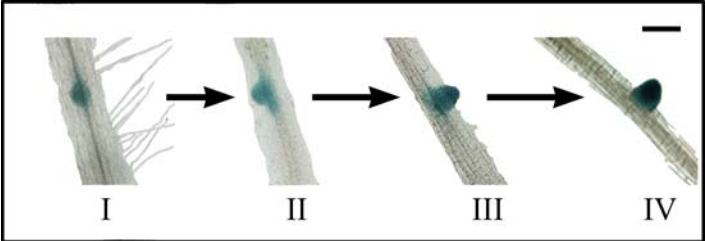

Supplement: plntphys_pp.106.092130_1.pdf [file plntphys_pp.106.092130_1.pdf]
